# Supplementary material for: Timescales of Secondary Organic Aerosols to Reach Equilibrium at Various Temperatures and Relative Humidities
Source: Copernicus journal article supplement (doi:10.5194/acp-2019-76), 2019-02-05
Supplement: Supplementary file 1 [file acp-2019-76-supplement.pdf]

*Supplement of*

**Timescales of Secondary Organic Aerosols to Reach Equilibrium at  
Various Temperatures and Relative Humidities**

**Ying Li<sup>1</sup>, and Manabu Shiraiwa<sup>1,\*</sup>**

[1] Department of Chemistry, University of California, Irvine, California, USA.

\*Correspondence to: Manabu Shiraiwa (m.shiraiwa@uci.edu)

## Contents of this file

Tables S1 to S2

Figures S1 to S5

**Table S1.** Temperature-dependent kinetic parameters used in the simulations.

| Parameter<br>(Unit)                      | Description                                                                 | Equation <sup>a</sup>                                                                                                |
|------------------------------------------|-----------------------------------------------------------------------------|----------------------------------------------------------------------------------------------------------------------|
| $\omega$ (cm s <sup>-1</sup> )           | mean thermal velocity                                                       | $\omega(T) = (8RT/(\pi M))^{1/2}$                                                                                    |
| $D_g$ (cm <sup>2</sup> s <sup>-1</sup> ) | gas-phase diffusion coefficient                                             | $D_g(T, P) = (T/T_{\text{standard}})^{1.75} (P_{\text{standard}}/P) D_g(T_{\text{standard}}, P_{\text{standard}})^b$ |
| $D_b$ (cm <sup>2</sup> s <sup>-1</sup> ) | bulk diffusion coefficient                                                  | $D_b(T, RH) = kT/(6\pi a\eta(T, RH))$                                                                                |
| $k_a$ (cm s <sup>-1</sup> )              | first-order adsorption rate coefficient                                     | $k_a(T) = \alpha_s \omega(T)/4$                                                                                      |
| $k_d$ (s <sup>-1</sup> )                 | first-order desorption rate coefficient                                     | $k_d(T) = Ae^{-(E_{des}/(RT))}$                                                                                      |
| $k_{ss,s}$ (cm s <sup>-1</sup> )         | first-order rate coefficient for quasi-static-to-sorption layer transport   | $k_{ss,s}(T, RH) = 2D_b(T, RH) / (\delta_{ss} + \delta_z)$                                                           |
| $k_{s,ss}$ (s <sup>-1</sup> )            | first-order rate coefficient for sorption-to-quasi-static surface transport | $k_{s,ss}(T, RH) = k_{ss,s}(T, RH)k_d(T)[Z]_{ss,eq} / (k_a(T)[Z]_{g,eq})$                                            |
| $k_{b1,ss}$ (cm s <sup>-1</sup> )        | rate coefficient of bulk layer 1-to-quasi-static surface transport          | $k_{b1,ss}(T, RH) = 2D_b(T, RH) / (\delta_{ss} + \delta(1))$                                                         |
| $k_{ss,b1}$ (cm s <sup>-1</sup> )        | rate coefficient of surface-to-bulk layer 1 transport                       | $k_{ss,b1}(T, RH) = k_{b1,ss}(T, RH)$                                                                                |
| $k_{b,b}$ (cm s <sup>-1</sup> )          | rate coefficient of transport between bulk layers                           | $k_{b,b}(T, RH) = 2D_b(T, RH) / (\delta(k) + \delta(k + 1))$                                                         |
| $\tau_d$ (s)                             | desorption lifetime                                                         | $\tau_d = k_d^{-1}$                                                                                                  |

<sup>a</sup> Description and the values of the symbols shown in the equations are summarized in Table S2.

<sup>b</sup>  $D_g(T_{\text{standard}}, P_{\text{standard}})$  is calculated by the EPA on-line tools:

(<https://www3.epa.gov/ceampubl/learn2model/part-two/onsite/estdiffusion-ext.html>).

**Table S2.** Description and the values of the symbols in the equations of Table S1.

| Variable (Unit)                            | Description                                                                           | Value                  |
|--------------------------------------------|---------------------------------------------------------------------------------------|------------------------|
| $R$ (J K <sup>-1</sup> mol <sup>-1</sup> ) | gas constant                                                                          | 8.314                  |
| $T$ (K)                                    | temperature                                                                           | varied from 220 to 310 |
| RH (%)                                     | relative humidity                                                                     | varied from 0 to 100   |
| $M$ (g mol <sup>-1</sup> )                 | molar mass of compound Z                                                              | 200                    |
| $T_0$ (K)                                  | room temperature                                                                      | 298                    |
| $\rho$ (g cm <sup>-3</sup> )               | density of organic particles                                                          | 1.4                    |
| $T_{\text{standard}}$ (K)                  | sea level standard temperature                                                        | 288.15                 |
| $P_{\text{standard}}$ (Pa)                 | sea level standard atmospheric pressure                                               | 101325                 |
| $K$ (J K <sup>-1</sup> )                   | Boltzmann constant                                                                    | $1.38 \times 10^{-23}$ |
| $a$ (cm)                                   | effective molecular radius                                                            | $10^{-8}$              |
| $\delta_z$ (cm)                            | effective molecular diameter                                                          | $2 \times 10^{-8}$     |
| $\alpha_{s,0}$                             | surface accommodation coefficient on free-substrate                                   | 1                      |
| $A$ (s <sup>-1</sup> )                     | pre-exponential factor                                                                | $10^{12}$              |
| $E_{\text{des}}$ (kJ mol <sup>-1</sup> )   | desorption energy                                                                     | 40                     |
| $[Z]_{\text{g,eq}}$ (cm <sup>-3</sup> )    | equilibrium (saturation) number concentrations of Z in the gas phase                  | variable               |
| $[Z]_{\text{ss,eq}}$ (cm <sup>-2</sup> )   | equilibrium (saturation) number concentrations of Z in the quasi-static surface layer | variable               |
| $\delta_{\text{ss}}$ (cm)                  | thickness of the quasi-static surface layer                                           | variable               |
| $\delta(k)$ (cm)                           | thickness of the bulk layer $k$                                                       | variable               |

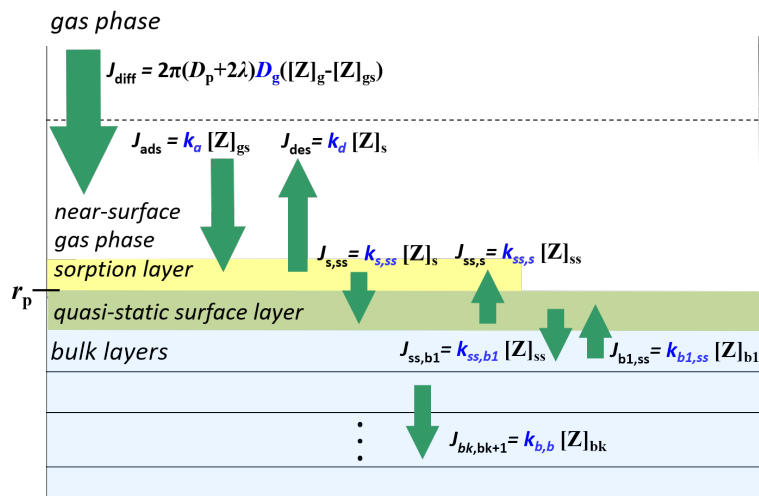

**Figure S1.** Temperature-dependent kinetic processes simulated in the KM-GAP model. Parameters in blue are treated as a function of temperature (Table S1).  $[Z]$  are concentrations of species  $Z$  in the gas (g) and near-surface gas phases (gs), at the sorption layer (s) and in the surface (ss) and in the bulk (b) layers.  $J$  are the transport fluxes between each layer, including the gas-phase diffusion flux ( $J_{\text{diff}}$ ), the adsorption ( $J_{\text{ads}}$ ) and desorption ( $J_{\text{des}}$ ) fluxes, surface–bulk exchange fluxes ( $J_{s,ss}$ ,  $J_{ss,s}$ ,  $J_{ss,b1}$ ,  $J_{b1,ss}$ ), and bulk diffusion fluxes ( $J_{b,b}$ ).

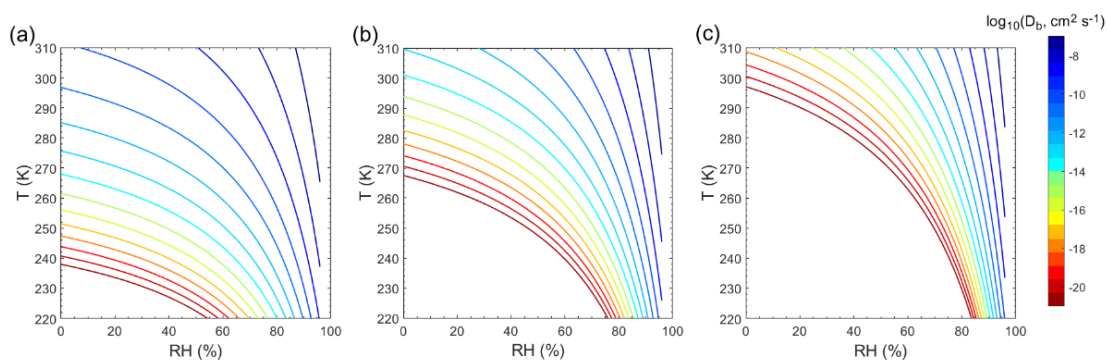

**Figure S2.** Bulk diffusion coefficient ( $D_b$ ) in pre-existing particles as a function of temperature and relative humidity. The glass transition temperatures under dry conditions ( $T_{g,\text{org}}$ ) are set to be (a) 240 K, (b) 270 K and (c) 300 K, respectively.

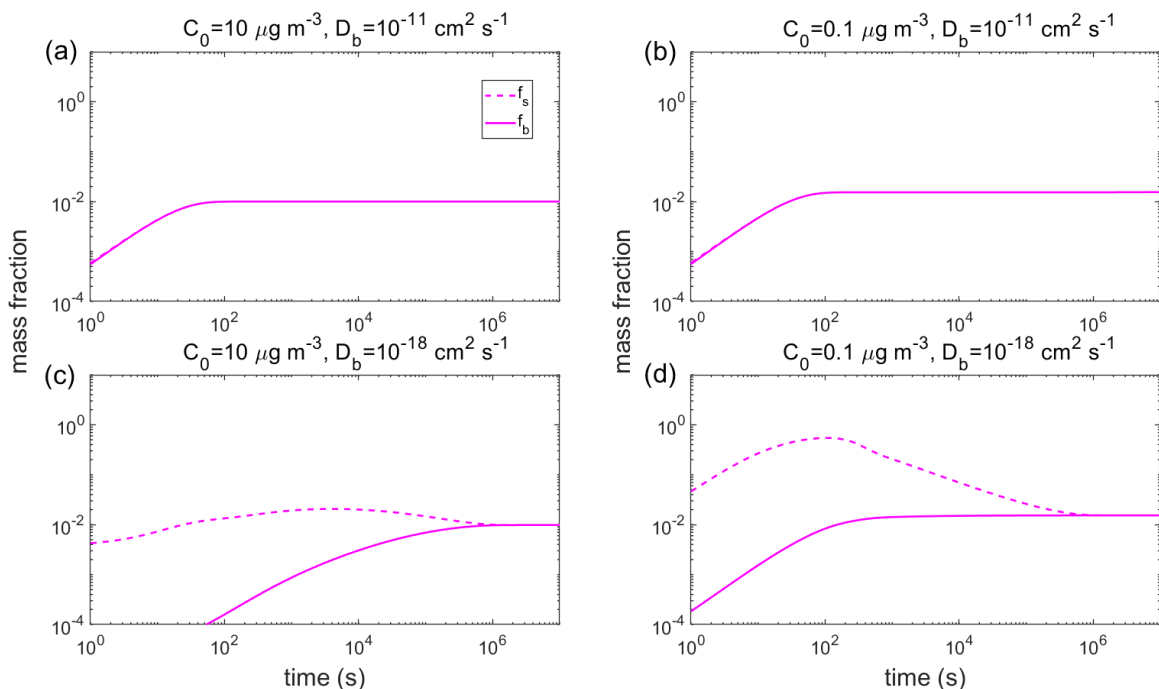

**Figure S3.** Temporal evolution of the mass fraction of Z in the near-surface bulk ( $f_s$ ), and the average fraction of Z in the entire bulk ( $f_b$ ). RH = 60% and  $T$  is (a, b) 298 K and (c, d) 250 K. The  $C_0$  of Z is (a, c)  $10 \mu\text{g m}^{-3}$  and (b, d)  $0.1 \mu\text{g m}^{-3}$ . The glass transition temperature of pre-existing particles under dry conditions ( $T_{g,\text{org}}$ ) is set to be 270 K, which leads to  $D_b$  of (a, b)  $10^{-11} \text{cm}^2 \text{s}^{-1}$  and (c, d)  $10^{-18} \text{cm}^2 \text{s}^{-1}$ . The initial mass concentration of pre-existing particles is assumed to be  $20 \mu\text{g m}^{-3}$  with the number concentrations of  $3 \times 10^4 \text{cm}^{-3}$  and the initial particle diameter of 100 nm.

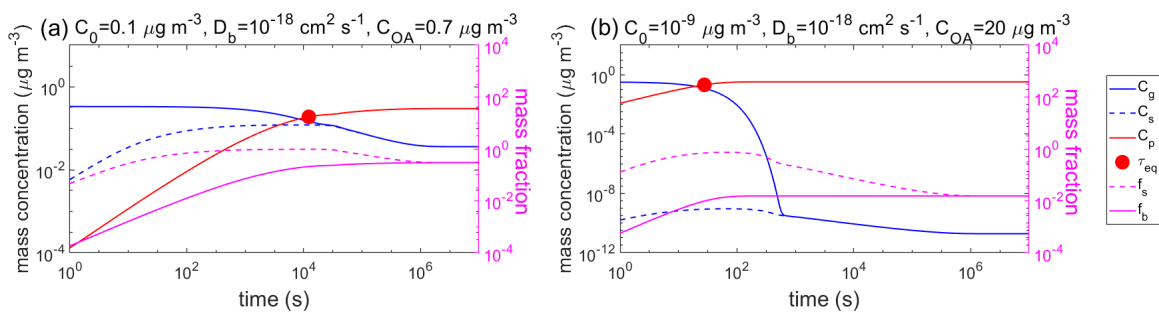

**Figure S4.** Temporal evolution of mass concentrations of the condensing compound Z in the gas phase ( $C_g$ ), just above the particle surface ( $C_s$ ), and in the particle phase ( $C_p$ ). The mass fraction of Z in the near-surface bulk ( $f_s$ ), and the average fraction of Z in the entire particle bulk ( $f_b$ ) are also shown.  $D_b$  is  $10^{-18} \text{cm}^2 \text{s}^{-1}$ . The  $C_0$  of Z is (a)  $0.1 \mu\text{g m}^{-3}$  and (b)  $10^{-9} \mu\text{g m}^{-3}$ . The initial mass concentration of pre-existing particles is set to be (a)  $0.7 \mu\text{g m}^{-3}$  and (b)  $20 \mu\text{g m}^{-3}$ .  $\tau_{\text{eq}}$  is marked with the red circle.  $\tau_{\text{eq}}$  ( $\sim 28$  s) in (b) is consistent with the inverse of the condensation sink (29 s).

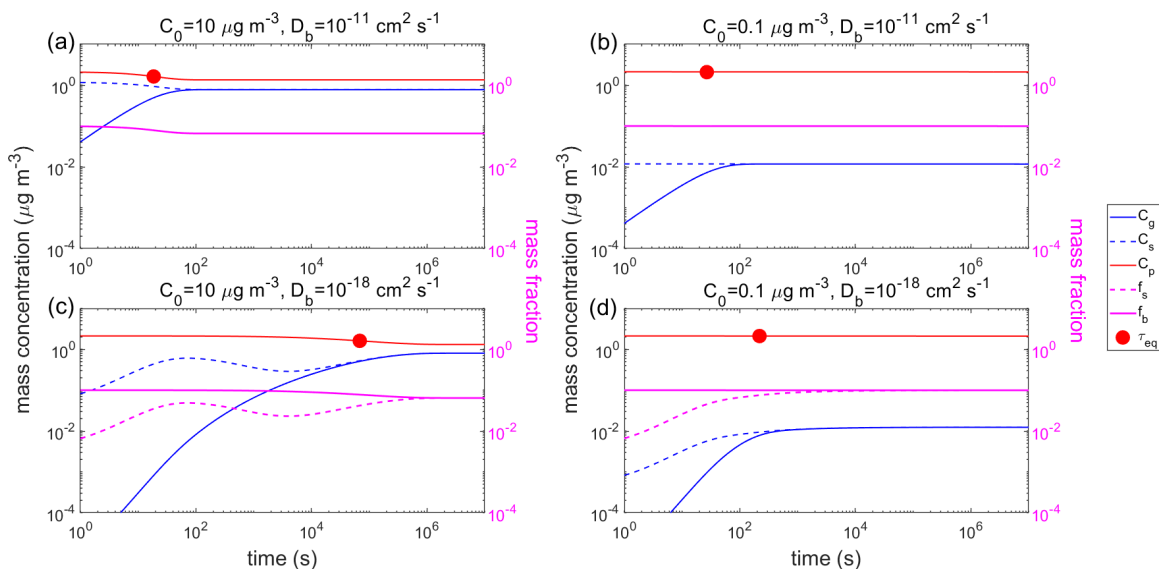

**Figure S5.** Temporal evolution of mass concentrations of the condensing compound Z in the gas phase ( $C_g$ ), just above particle surface ( $C_s$ ), in the particle phase ( $C_p$ ), the mass fraction of Z in the near-surface bulk ( $f_s$ ), and the average fraction of Z in the entire particle bulk ( $f_b$ ).  $\tau_{eq}$  are marked with red circles. RH = 60% and  $T$  is (a–b) 298 K and (c–d) 250 K. The  $C_0$  of the condensing compound is (a, c)  $10 \mu\text{g m}^{-3}$  and (b, d)  $0.1 \mu\text{g m}^{-3}$ . The glass transition temperature of pre-existing particles under dry conditions ( $T_{g,org}$ ) is set to be 270 K, which leads to  $D_b$  of (a, b)  $10^{-11} \text{ cm}^2 \text{ s}^{-1}$  and (c, d)  $10^{-18} \text{ cm}^2 \text{ s}^{-1}$ . The initial mass concentration of pre-existing non-volatile particles ( $C_{OA}$ ) is assumed to be  $20 \mu\text{g m}^{-3}$  with the number concentrations of  $3 \times 10^4 \text{ cm}^{-3}$  and the initial particle diameter of 100 nm.
